# Supplementary material for: Early transcriptomic response of mouse adrenal gland and Y-1 cells to dexamethasone
Source: PubMed Central journal article supplement — Endocr Connect. 2022 Jun 23;11(8):e220064. doi: 10.1530/EC-22-0064 (PMC9346337; doi:10.1530/ec-22-0064), 2022-06-23
Supplement: supplementary_figure_1.pdf [file supplementary_figure_1.pdf]

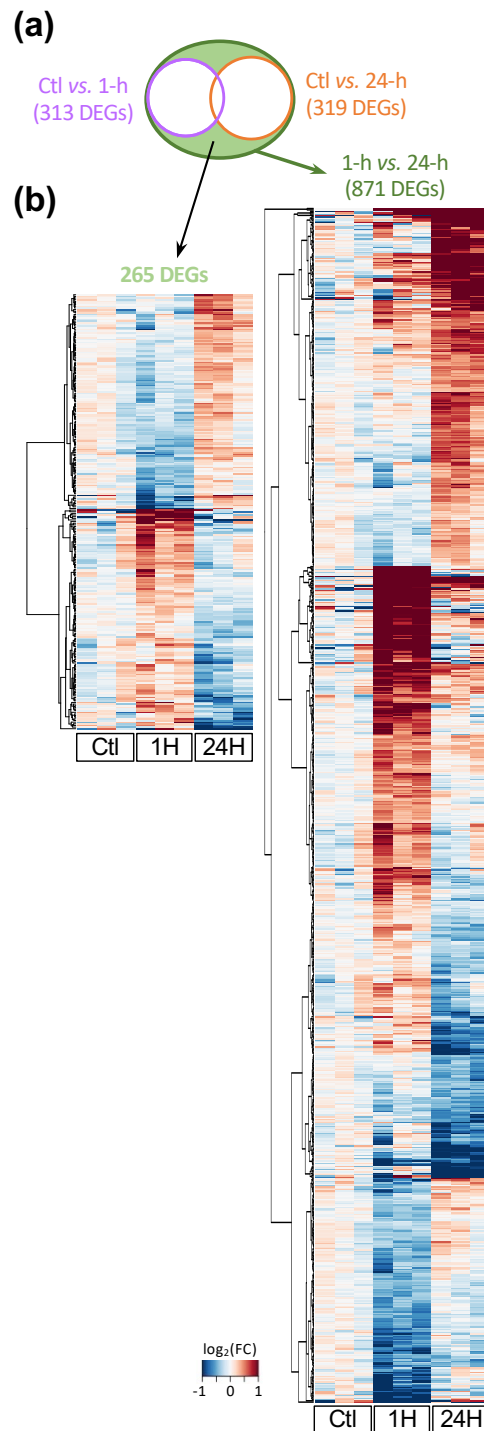

### Supplementary Fig. 1

(a) The Venn diagram showed DEGs identified through different comparisons. 871 DEGs were identified when using DESeq2 to compare the 1-h and the 24-h treatment groups. All 606 DEGs shown in Fig. 1a (from the comparisons of the Ctl vs. 1-h treatment and the Ctl vs. 12-h treatment) were included in these 871 DEGs. (b) For the additional 265 DEGs identified through the comparison of the 1-h and the 24-h treatment groups, the heatmap showed that these genes had an opposite response. This result further supports our finding of the transient early response of Y-1 cells to dexamethasone treatment.
